# Supplementary material for: High throughput screening of pure silica zeolites for CF4 capture from electronics industry gas
Source: Royal Society of Chemistry journal article supplement (doi:10.1039/d4cp00171k), 2024-01-01
Supplement: d4cp00171k1.pdf [file d4cp00171k1.pdf]

## Supplementary Material

### High throughput screening of pure silica zeolites for CF<sub>4</sub> capture from electronics industry

Xiao-Dong Li,\*<sup>1</sup>

<sup>1</sup>*College of Science, Henan University of Technology, Zhengzhou 450001, China*

The supporting information provides additional details on the experimental results and data analysis of adsorbing and separating CF<sub>4</sub> and N<sub>2</sub> mixed gases in pure silica zeolites. Specifically, it includes six figures and two tables, which are intended to enhance the reader's understanding of the main paper by providing visual aids and further clarifying the data.

---

\*To whom correspondence should be addressed. E-mail: xiaodongli@haut.edu.cn

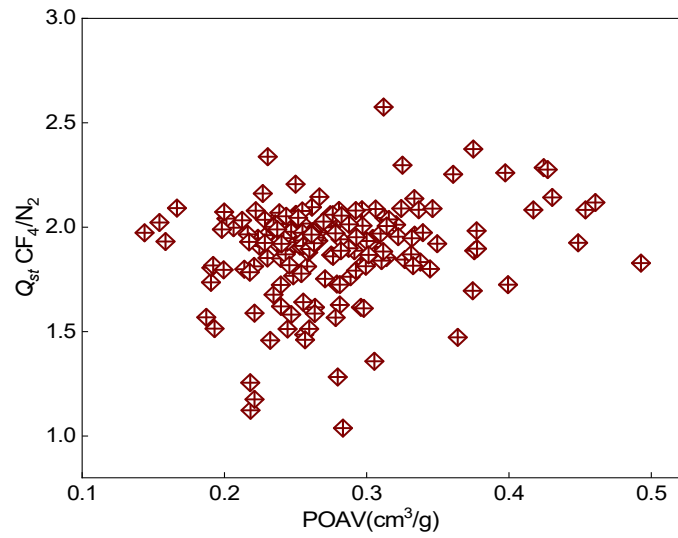

**Figure S1.** Relationship between the ratio of adsorption heat of  $\text{CF}_4$  and  $\text{N}_2$  and the pore volume of each zeolite.

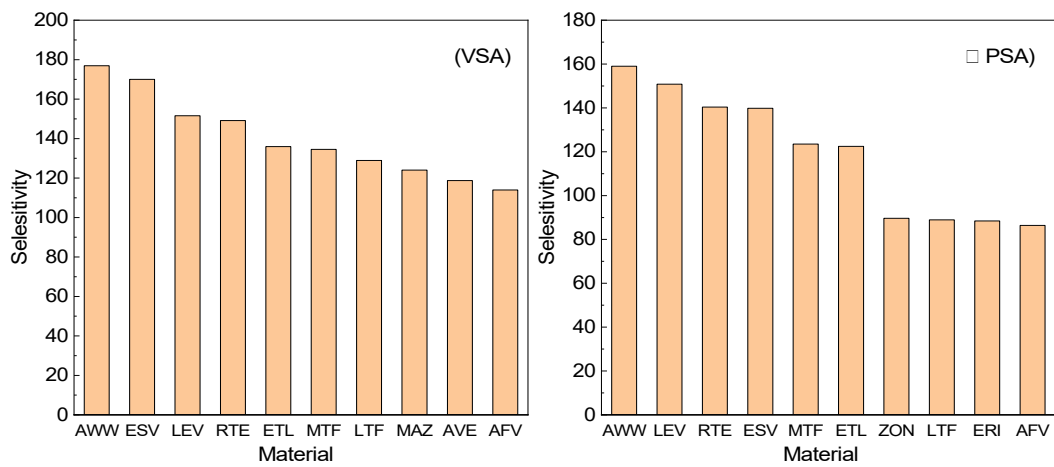

**Figure S2.** Top ten pure silica zeolite materials ranked by adsorption selectivity ( $\text{CF}_4/\text{N}_2$ ) in VSA and PSA processes respectively.

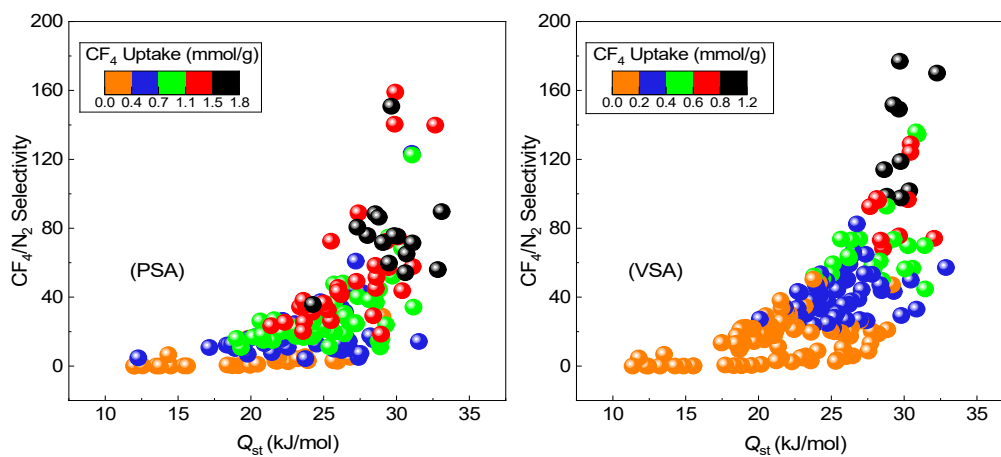

**Figure S3.** Relationship between the adsorption heat and selectivity of  $\text{CF}_4$  on 181 pure silica zeolite structures under VSA and PSA processes, color-mapped by the numerical values of  $\text{CF}_4$  adsorption.

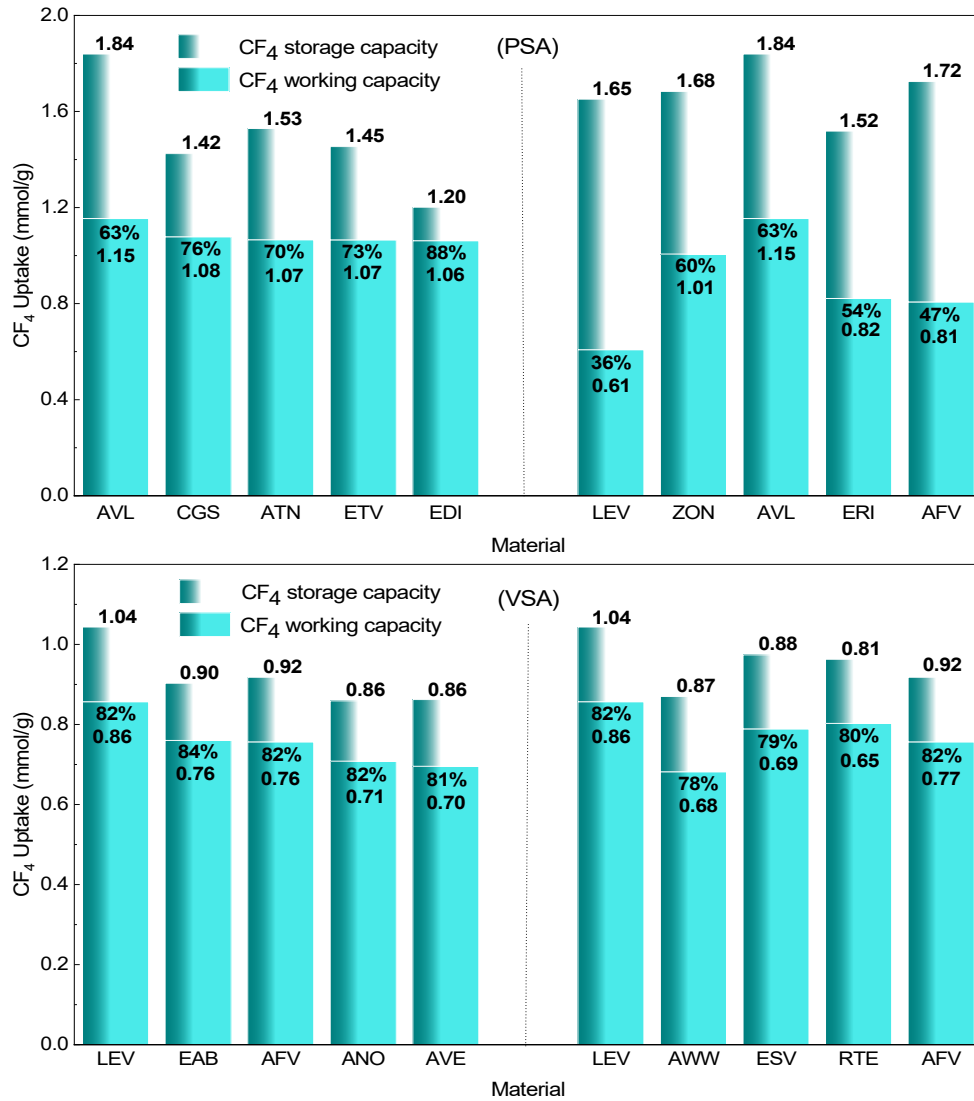

**Figure S4.** Adsorption capacities of the top five zeolite materials, based on both working capacity and APS, were shown in VSA and PSA processes. The blue area specifically highlights their regenerability.

In the PSA process, the top five zeolite materials in terms of working capacity are AVL, CGS, ATN, ETV, and EDI, while the top five zeolite materials in terms of APS are LEV, ZON, AVL, ERI, and AFV. AVL ranks in the top five for both working capacity and APS, indicating that this material exhibits excellent performance. In the VSA process, the top five zeolite materials in terms of working capacity are LEV, EAB, AFV, ANO, and AVE, while the top five zeolite materials in terms of APS are LEV,

AWW, ESV, RTE, and AFV. Notably, both LEV and AFV appeared in the top five for both work capacity and APS, highlighting their exceptional adsorption and separation performance. In both PSA and VSA processes, EDI and EAB demonstrate the highest regenerability, reaching 88% and 84%, respectively. However, despite EDI's excellent regenerability, its selectivity is only 18.48, resulting in relatively poor adsorption and separation performance for  $\text{CF}_4$ . In contrast, EAB exhibits a selectivity of up to 97.56, demonstrating excellent adsorption and separation performance for  $\text{CF}_4$  compared to most zeolite materials. These findings provide important insights for further understanding and applying these zeolite materials

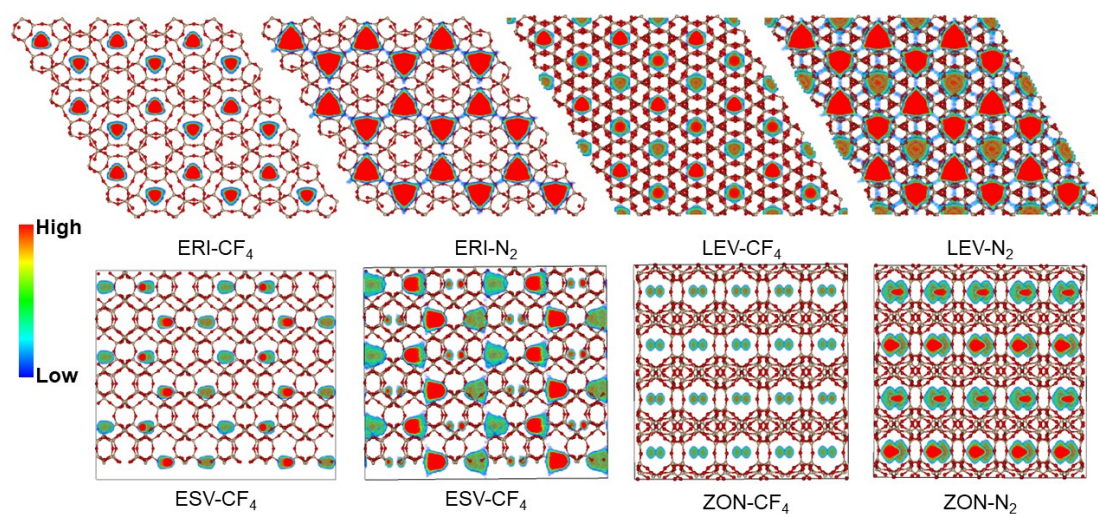

**Figure S5.** Selected high-performance pure silica zeolite materials ERI, LEV, ESV, and ZON were studied for their preferential adsorption sites for  $\text{CF}_4$  and  $\text{N}_2$  molecules at 298 K and 1 bar.

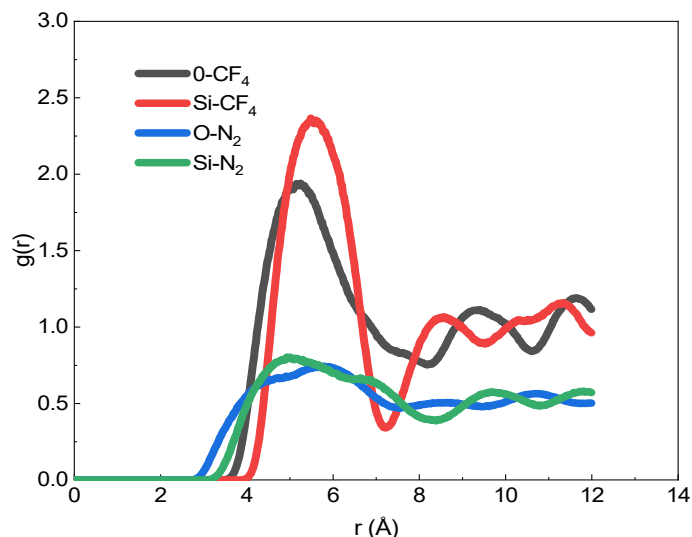

**Figure S6.** RDF plots of  $\text{CF}_4$  and  $\text{N}_2$  molecules generated during adsorption and separation of zeolite material AWW at 1 bar and 298 K.

**Table S1.** Pore structure parameters of 181 screened pure silica zeolites.

| Material | Density<br>( $\text{g}/\text{cm}^3$ ) | LCD<br>(Å) | ASA<br>( $\text{m}^2/\text{g}$ ) | POAV<br>( $\text{cm}^3/\text{g}$ ) | Porosity |
|----------|---------------------------------------|------------|----------------------------------|------------------------------------|----------|
| AEI      | 1.50                                  | 6.90       | 1248.14                          | 0.33                               | 0.40     |
| AEL      | 1.91                                  | 5.23       | 459.55                           | 0.19                               | 0.18     |
| AET      | 1.82                                  | 7.77       | 506.51                           | 0.22                               | 0.24     |
| AFI      | 1.69                                  | 7.57       | 643.57                           | 0.26                               | 0.28     |
| AFN      | 1.74                                  | 4.75       | 746.95                           | 0.25                               | 0.24     |
| AFO      | 1.92                                  | 5.03       | 472.13                           | 0.19                               | 0.19     |
| AFR      | 1.51                                  | 7.82       | 1107.97                          | 0.33                               | 0.40     |
| AFS      | 1.71                                  | 9.11       | 1067.57                          | 0.30                               | 0.42     |
| AFT      | 1.64                                  | 6.78       | 1146.50                          | 0.31                               | 0.39     |
| AFV      | 1.57                                  | 6.44       | 1124.84                          | 0.31                               | 0.38     |
| AFX      | 1.60                                  | 6.79       | 1170.76                          | 0.31                               | 0.39     |
| AFY      | 1.83                                  | 7.42       | 1192.73                          | 0.30                               | 0.45     |
| ANO      | 1.65                                  | 6.31       | 880.10                           | 0.28                               | 0.32     |
| APD      | 1.79                                  | 4.22       | 592.36                           | 0.22                               | 0.21     |
| ASV      | 1.91                                  | 4.95       | 602.89                           | 0.19                               | 0.21     |
| ATN      | 1.78                                  | 5.51       | 569.71                           | 0.23                               | 0.23     |
| ATO      | 2.62                                  | 5.34       | 322.77                           | 0.14                               | 0.18     |
| ATS      | 1.60                                  | 6.58       | 824.26                           | 0.29                               | 0.32     |
| ATT      | 1.70                                  | 4.89       | 940.12                           | 0.26                               | 0.29     |
| AVE      | 1.65                                  | 6.02       | 879.17                           | 0.28                               | 0.33     |
| AVL      | 1.70                                  | 6.28       | 1027.56                          | 0.28                               | 0.36     |
| AWO      | 1.82                                  | 4.49       | 527.95                           | 0.22                               | 0.18     |
| AWW      | 1.69                                  | 6.86       | 773.46                           | 0.26                               | 0.31     |
| BEC      | 1.51                                  | 6.24       | 1129.63                          | 0.33                               | 0.42     |
| BOF      | 1.82                                  | 5.16       | 702.09                           | 0.22                               | 0.26     |
| BOG      | 1.60                                  | 7.49       | 972.96                           | 0.30                               | 0.37     |
| BOZ      | 1.29                                  | 8.31       | 1790.97                          | 0.45                               | 0.45     |

| Material | Density<br>(g/cm <sup>3</sup> ) | LCD<br>(Å) | ASA<br>(m <sup>2</sup> /g) | POAV<br>(cm <sup>3</sup> /g) | Porosity |
|----------|---------------------------------|------------|----------------------------|------------------------------|----------|
| BPH      | 1.71                            | 9.11       | 1061.79                    | 0.30                         | 0.42     |
| BSV      | 1.87                            | 4.76       | 757.43                     | 0.22                         | 0.22     |
| CAN      | 1.91                            | 5.76       | 474.05                     | 0.23                         | 0.28     |
| CDO      | 1.80                            | 4.73       | 720.13                     | 0.22                         | 0.24     |
| CFI      | 1.67                            | 7.07       | 631.33                     | 0.27                         | 0.28     |
| CGF      | 1.90                            | 5.04       | 262.21                     | 0.20                         | 0.20     |
| CGS      | 1.69                            | 5.30       | 962.19                     | 0.27                         | 0.29     |
| CHA      | 1.90                            | 6.74       | 989.30                     | 0.26                         | 0.40     |
| CON      | 1.57                            | 6.76       | 1054.56                    | 0.31                         | 0.39     |
| CSV      | 1.62                            | 7.13       | 983.84                     | 0.29                         | 0.38     |
| DAC      | 1.74                            | 4.78       | 869.18                     | 0.24                         | 0.28     |
| DDR      | 2.19                            | 7.03       | 452.77                     | 0.19                         | 0.29     |
| DFO      | 1.59                            | 10.89      | 1080.76                    | 0.32                         | 0.42     |
| DFT      | 1.77                            | 4.19       | 704.69                     | 0.24                         | 0.24     |
| DON      | 1.71                            | 8.18       | 593.86                     | 0.26                         | 0.28     |
| EAB      | 1.59                            | 6.51       | 1055.49                    | 0.30                         | 0.36     |
| EDI      | 1.62                            | 4.88       | 1013.99                    | 0.29                         | 0.30     |
| EMT      | 1.42                            | 11.00      | 1057.98                    | 0.40                         | 0.49     |
| EON      | 1.68                            | 7.27       | 834.43                     | 0.26                         | 0.30     |
| EPI      | 1.76                            | 4.90       | 813.05                     | 0.23                         | 0.28     |
| ERI      | 1.68                            | 6.30       | 972.29                     | 0.28                         | 0.35     |
| ESV      | 1.77                            | 5.65       | 609.44                     | 0.24                         | 0.27     |
| ETL      | 1.80                            | 5.77       | 641.92                     | 0.22                         | 0.22     |
| ETR      | 1.59                            | 9.61       | 591.35                     | 0.31                         | 0.36     |
| ETV      | 1.73                            | 5.27       | 820.04                     | 0.25                         | 0.28     |
| EUO      | 1.71                            | 6.19       | 707.13                     | 0.25                         | 0.28     |
| EWO      | 1.90                            | 4.64       | 304.11                     | 0.19                         | 0.16     |
| EWS      | 1.73                            | 5.46       | 938.83                     | 0.25                         | 0.31     |
| EZT      | 1.72                            | 5.90       | 769.66                     | 0.25                         | 0.30     |
| FAU      | 1.33                            | 10.70      | 1128.65                    | 0.42                         | 0.49     |
| FER      | 1.75                            | 5.14       | 803.82                     | 0.24                         | 0.28     |
| GIS      | 1.64                            | 4.57       | 1181.51                    | 0.28                         | 0.30     |
| GME      | 1.90                            | 7.12       | 985.20                     | 0.26                         | 0.39     |
| GON      | 1.89                            | 5.84       | 464.20                     | 0.21                         | 0.22     |
| HEU      | 1.75                            | 5.22       | 846.77                     | 0.24                         | 0.28     |
| IFO      | 1.72                            | 7.41       | 697.74                     | 0.25                         | 0.31     |
| IFR      | 1.71                            | 6.39       | 812.41                     | 0.25                         | 0.34     |
| IFW      | 1.58                            | 7.19       | 960.62                     | 0.30                         | 0.36     |
| IFY      | 1.76                            | 6.39       | 746.67                     | 0.24                         | 0.30     |
| IHW      | 1.84                            | 6.07       | 617.22                     | 0.21                         | 0.25     |
| IMF      | 1.74                            | 6.69       | 768.85                     | 0.24                         | 0.29     |
| IRN      | 1.53                            | 8.60       | 839.28                     | 0.32                         | 0.40     |
| IRR      | 1.71                            | 13.90      | 974.85                     | 0.36                         | 0.55     |
| ISV      | 1.50                            | 6.34       | 1136.36                    | 0.34                         | 0.41     |
| ITE      | 1.57                            | 7.77       | 976.01                     | 0.30                         | 0.36     |
| ITG      | 1.65                            | 6.42       | 958.26                     | 0.27                         | 0.35     |
| ITH      | 1.74                            | 6.30       | 805.04                     | 0.24                         | 0.28     |
| ITR      | 1.73                            | 5.96       | 813.25                     | 0.25                         | 0.29     |
| ITT      | 1.28                            | 12.77      | 1271.97                    | 0.45                         | 0.51     |
| IWR      | 1.56                            | 6.90       | 1065.55                    | 0.31                         | 0.39     |
| IWS      | 1.48                            | 7.63       | 1141.92                    | 0.35                         | 0.43     |
| IWV      | 1.50                            | 8.11       | 1004.41                    | 0.34                         | 0.40     |
| IWW      | 1.66                            | 6.53       | 912.69                     | 0.28                         | 0.34     |
| JOZ      | 1.63                            | 4.42       | 979.74                     | 0.28                         | 0.24     |
| JSN      | 1.78                            | 4.53       | 732.07                     | 0.23                         | 0.26     |
| JSR      | 1.23                            | 7.43       | 1972.83                    | 0.49                         | 0.52     |
| JST      | 1.43                            | 4.95       | 1813.42                    | 0.37                         | 0.37     |

| Material | Density<br>(g/cm <sup>3</sup> ) | LCD<br>(Å) | ASA<br>(m <sup>2</sup> /g) | POAV<br>(cm <sup>3</sup> /g) | Porosity |
|----------|---------------------------------|------------|----------------------------|------------------------------|----------|
| JZO      | 1.32                            | 11.50      | 1289.80                    | 0.43                         | 0.50     |
| KFI      | 1.49                            | 10.16      | 1227.58                    | 0.34                         | 0.39     |
| LAU      | 1.80                            | 5.47       | 719.04                     | 0.23                         | 0.26     |
| LEV      | 1.59                            | 6.39       | 1049.10                    | 0.30                         | 0.36     |
| LOV      | 1.68                            | 3.74       | 955.55                     | 0.27                         | 0.26     |
| LTA      | 1.41                            | 10.23      | 1087.66                    | 0.37                         | 0.46     |
| LTF      | 1.78                            | 7.72       | 741.07                     | 0.25                         | 0.29     |
| LTL      | 1.82                            | 9.61       | 575.56                     | 0.25                         | 0.29     |
| MAZ      | 1.96                            | 7.55       | 730.53                     | 0.23                         | 0.31     |
| MEI      | 1.67                            | 7.66       | 1080.50                    | 0.31                         | 0.42     |
| MEL      | 1.73                            | 6.86       | 771.45                     | 0.25                         | 0.30     |
| MER      | 1.63                            | 6.25       | 1067.12                    | 0.28                         | 0.30     |
| MFI      | 1.84                            | 5.94       | 704.46                     | 0.21                         | 0.26     |
| MFS      | 1.74                            | 6.21       | 762.15                     | 0.24                         | 0.28     |
| MOR      | 1.69                            | 6.20       | 808.92                     | 0.26                         | 0.30     |
| MOZ      | 1.74                            | 9.63       | 693.84                     | 0.25                         | 0.29     |
| MRT      | 1.71                            | 5.38       | 847.21                     | 0.25                         | 0.28     |
| MSE      | 1.63                            | 6.49       | 913.60                     | 0.28                         | 0.35     |
| MTF      | 2.07                            | 5.57       | 387.26                     | 0.15                         | 0.19     |
| MTT      | 1.82                            | 5.48       | 534.81                     | 0.22                         | 0.21     |
| MTW      | 1.82                            | 5.31       | 559.27                     | 0.22                         | 0.23     |
| MWF      | 1.60                            | 10.06      | 1159.38                    | 0.29                         | 0.33     |
| MWW      | 2.08                            | 5.73       | 766.97                     | 0.23                         | 0.37     |
| NES      | 1.64                            | 6.17       | 857.80                     | 0.28                         | 0.32     |
| NPO      | 1.59                            | 4.91       | 932.32                     | 0.30                         | 0.28     |
| NPT      | 1.34                            | 5.76       | 1693.24                    | 0.42                         | 0.41     |
| OBW      | 1.27                            | 8.86       | 1833.09                    | 0.46                         | 0.45     |
| OFF      | 1.75                            | 6.50       | 931.91                     | 0.27                         | 0.35     |
| OKO      | 1.75                            | 6.30       | 800.49                     | 0.24                         | 0.32     |
| OSI      | 1.77                            | 6.26       | 511.21                     | 0.23                         | 0.22     |
| OSO      | 1.74                            | 5.67       | 1304.89                    | 0.33                         | 0.42     |
| OWE      | 1.71                            | 5.18       | 926.36                     | 0.26                         | 0.30     |
| PAU      | 1.59                            | 10.08      | 1174.81                    | 0.30                         | 0.34     |
| PCR      | 1.87                            | 4.73       | 557.17                     | 0.20                         | 0.22     |
| PHI      | 1.63                            | 5.00       | 1115.91                    | 0.28                         | 0.31     |
| PON      | 1.81                            | 4.50       | 658.05                     | 0.22                         | 0.22     |
| POR      | 1.75                            | 5.39       | 906.58                     | 0.24                         | 0.31     |
| POS      | 1.55                            | 6.71       | 1074.79                    | 0.32                         | 0.40     |
| PSI      | 2.05                            | 5.34       | 236.47                     | 0.16                         | 0.11     |
| PTO      | 1.81                            | 4.82       | 717.96                     | 0.22                         | 0.25     |
| PTY      | 1.70                            | 4.67       | 1016.13                    | 0.26                         | 0.32     |
| PUN      | 1.49                            | 4.98       | 1518.86                    | 0.34                         | 0.38     |
| PWN      | 1.56                            | 9.37       | 1182.44                    | 0.31                         | 0.36     |
| PWO      | 1.71                            | 4.75       | 997.02                     | 0.26                         | 0.32     |
| PWW      | 1.70                            | 4.72       | 933.94                     | 0.26                         | 0.31     |
| RHO      | 1.44                            | 10.03      | 1235.98                    | 0.36                         | 0.43     |
| RSN      | 1.68                            | 3.75       | 925.59                     | 0.27                         | 0.24     |
| RTE      | 1.71                            | 6.36       | 762.95                     | 0.25                         | 0.31     |
| RTH      | 1.61                            | 7.63       | 945.35                     | 0.29                         | 0.36     |
| RWY      | 0.76                            | 15.04      | 2830.28                    | 1.00                         | 0.70     |
| SAF      | 1.90                            | 6.24       | 452.25                     | 0.20                         | 0.21     |
| SAO      | 1.42                            | 8.20       | 1272.48                    | 0.38                         | 0.47     |
| SAS      | 1.49                            | 8.55       | 1021.86                    | 0.33                         | 0.39     |
| SAT      | 2.29                            | 6.17       | 626.62                     | 0.20                         | 0.32     |
| SAV      | 1.46                            | 8.22       | 1288.67                    | 0.35                         | 0.39     |
| SBE      | 1.37                            | 12.10      | 1165.22                    | 0.40                         | 0.45     |
| SBN      | 1.61                            | 4.39       | 1087.72                    | 0.29                         | 0.29     |



| Material | Density<br>(g/cm <sup>3</sup> ) | LCD<br>(Å) | ASA<br>(m <sup>2</sup> /g) | POAV<br>(cm <sup>3</sup> /g) | Porosity |
|----------|---------------------------------|------------|----------------------------|------------------------------|----------|
| SBS      | 1.46                            | 10.95      | 1117.22                    | 0.38                         | 0.46     |
| SBT      | 1.46                            | 10.40      | 1117.92                    | 0.38                         | 0.46     |
| SEW      | 1.70                            | 6.24       | 880.82                     | 0.26                         | 0.33     |
| SFE      | 1.69                            | 6.24       | 707.13                     | 0.26                         | 0.28     |
| SFF      | 1.78                            | 7.04       | 748.55                     | 0.24                         | 0.32     |
| SFG      | 1.76                            | 6.36       | 633.62                     | 0.23                         | 0.25     |
| SFH      | 1.65                            | 7.65       | 723.95                     | 0.28                         | 0.31     |
| SFN      | 1.65                            | 7.41       | 720.77                     | 0.28                         | 0.30     |
| SFO      | 1.51                            | 7.49       | 1103.25                    | 0.33                         | 0.39     |
| SFS      | 1.66                            | 6.76       | 891.31                     | 0.27                         | 0.34     |
| SFW      | 1.51                            | 6.79       | 1244.60                    | 0.33                         | 0.39     |
| SIV      | 1.63                            | 4.62       | 1153.53                    | 0.28                         | 0.31     |
| SOF      | 1.64                            | 4.74       | 1151.97                    | 0.28                         | 0.34     |
| SOR      | 1.70                            | 6.41       | 710.41                     | 0.26                         | 0.29     |
| SOS      | 1.69                            | 4.37       | 1095.38                    | 0.27                         | 0.26     |
| SOV      | 1.53                            | 6.53       | 1103.28                    | 0.32                         | 0.41     |
| SSF      | 1.74                            | 7.26       | 694.17                     | 0.26                         | 0.31     |
| SSY      | 1.68                            | 6.65       | 705.68                     | 0.26                         | 0.28     |
| STF      | 1.68                            | 7.22       | 830.87                     | 0.26                         | 0.34     |
| STI      | 1.67                            | 5.82       | 973.18                     | 0.27                         | 0.33     |
| STT      | 1.69                            | 6.57       | 858.70                     | 0.26                         | 0.33     |
| STW      | 1.77                            | 4.91       | 1041.14                    | 0.26                         | 0.36     |
| SWY      | 1.60                            | 6.30       | 1010.70                    | 0.29                         | 0.35     |
| SZR      | 1.76                            | 5.59       | 719.46                     | 0.24                         | 0.25     |
| TER      | 1.70                            | 6.18       | 862.81                     | 0.25                         | 0.31     |
| THO      | 1.57                            | 4.47       | 1115.56                    | 0.31                         | 0.30     |
| TON      | 1.81                            | 5.04       | 534.47                     | 0.22                         | 0.21     |
| TSC      | 1.32                            | 15.87      | 1171.34                    | 0.43                         | 0.47     |
| TUN      | 1.76                            | 7.89       | 766.66                     | 0.24                         | 0.30     |
| UEI      | 1.74                            | 5.12       | 633.60                     | 0.24                         | 0.21     |
| UFI      | 1.52                            | 9.69       | 1078.14                    | 0.33                         | 0.42     |
| UOS      | 1.76                            | 5.32       | 767.61                     | 0.24                         | 0.25     |
| UOV      | 1.62                            | 6.21       | 958.81                     | 0.29                         | 0.36     |
| USI      | 1.59                            | 6.32       | 1116.85                    | 0.30                         | 0.37     |
| UTL      | 1.56                            | 8.49       | 979.16                     | 0.31                         | 0.40     |
| UWY      | 1.63                            | 8.38       | 946.95                     | 0.28                         | 0.35     |
| VET      | 2.01                            | 5.99       | 409.11                     | 0.17                         | 0.18     |
| VFI      | 1.57                            | 11.17      | 766.18                     | 0.34                         | 0.39     |
| YFI      | 1.64                            | 7.36       | 908.74                     | 0.28                         | 0.33     |
| ZON      | 1.80                            | 5.20       | 686.67                     | 0.23                         | 0.25     |

**Table S2.** Adsorption heat, adsorption capacity, and selectivity of selected pure zeolite materials.

| Material | CF <sub>4</sub> $Q_{st}$<br>(kJ/mol) | N <sub>2</sub> $Q_{st}$<br>(kJ/mol) | CF <sub>4</sub> Uptake<br>(mmol/g) | N <sub>2</sub> Uptake<br>(mmol/g) | S (CF <sub>4</sub> /N <sub>2</sub> ) |
|----------|--------------------------------------|-------------------------------------|------------------------------------|-----------------------------------|--------------------------------------|
| AWW      | 29.70                                | 14.17                               | 0.870                              | 0.044                             | 176.93                               |
| ESV      | 32.27                                | 15.91                               | 0.876                              | 0.046                             | 170.04                               |
| LEV      | 29.26                                | 14.04                               | 1.044                              | 0.062                             | 151.59                               |
| RTE      | 29.64                                | 14.50                               | 0.811                              | 0.049                             | 149.15                               |
| MAZ      | 30.43                                | 13.02                               | 0.690                              | 0.050                             | 124.05                               |
| ZON      | 32.07                                | 16.66                               | 0.677                              | 0.082                             | 74.14                                |
| ETR      | 29.29                                | 11.37                               | 0.403                              | 0.049                             | 73.56                                |
| PCR      | 32.87                                | 16.10                               | 0.358                              | 0.056                             | 57.17                                |
| LTA      | 27.91                                | 11.76                               | 0.582                              | 0.093                             | 56.29                                |
| VFI      | 13.53                                | 7.85                                | 0.025                              | 0.034                             | 6.77                                 |
| RWY      | 11.79                                | 6.76                                | 0.046                              | 0.089                             | 4.68                                 |
| PON      | 18.31                                | 15.57                               | 0.001                              | 0.059                             | 0.21                                 |
| AWO      | 18.84                                | 16.77                               | 0.001                              | 0.050                             | 0.21                                 |
| JOZ      | 15.54                                | 14.97                               | 0.001                              | 0.040                             | 0.11                                 |
